# Supplementary material for: SUMOylation mediates CtIP’s functions in DNA end resection and replication fork protection
Source: PubMed Central journal article supplement (PMC7826263; doi:10.1093/nar/gkaa1232), 2021-01-06

# SUPPLEMENTAL INFORMATION

## **SUMOylation Mediates CtIP's Functions in DNA End Resection and Replication Fork Protection**

Andrew J. Locke<sup>1</sup>, Lazina Hossain<sup>1†</sup>, Glynnis McCrostie<sup>1†</sup>, Daryl A. Ronato<sup>2,3</sup>, Amira Fitieh<sup>1,4</sup>,  
Tanzeem Ahmed Rafique<sup>1</sup>, Fatemeh Mashayekhi<sup>1</sup>, Mobina Motamedi<sup>1</sup>, Jean-Yves Masson<sup>2,3</sup>,  
and Ismail Hassan Ismail<sup>1,4\*</sup>

<sup>1</sup> Division of Experimental Oncology, Department of Oncology, Faculty of Medicine & Dentistry, University of Alberta; Cross Cancer Institute, Edmonton, Alberta, T6G 1Z2, Canada

<sup>2</sup> Oncology Division, CHU de Québec-Université Laval Research Center, Québec City, Québec, G1R 3S3, Canada

<sup>3</sup> Department of Molecular Biology, Medical Biochemistry and Pathology, Faculty of Medicine; Laval University Cancer Research Center, Université Laval, Québec City, Québec, G1V 0A6, Canada

<sup>4</sup> Biophysics Department, Faculty of Science, Cairo University, Giza, Egypt

† These authors contributed equally to this work.

**SUPPLEMENTAL FIGURE LEGENDS****Supplemental Figure S1: Related to Figure 1**

**A)** Schematic representation of the DR-GFP homologous recombination reporter cassette (1). The reporter contains two copies of a modified GFP gene, both of which are mutated to produce non-fluorescent protein products. One incorporates an I-*SceI* cutting site containing two stop codons (*SceGFP*); the other encodes an internal fragment of GFP (*iGFP*). Expression of I-*SceI* endonuclease generates a double-strand break in *SceGFP*. Repair of the break by gene conversion produces functional GFP. **B)** Immunoblot showing reduction in UBC9 expression 24 hours after transfecting GFP-tagged Gam1 into HeLa cells, representative of 2 independent experiments. **C)** HeLa cells were transfected with GFP-Gam1 or mock transfected. The cells were harvested 24 hours later and processed for DNA content analysis. Shown are the averages of 3 independent experiments. **D)** Quantitation of BrdU foci intensity in U-2 OS cells cultured in BrdU-containing media, pre-treated for 1 hour with 12  $\mu\text{M}$  GA or 0.025% DMSO, and stimulated for 1 hour in 1  $\mu\text{M}$  CPT in their presence. Evenly scaled IF images of both conditions were compared in tandem, and all  $\gamma\text{H2AX}^+$  cells were scored for their relative BrdU foci intensity (bright, dim, or no foci). The proportions of cells in each category were calculated per field of view. 40 fields of view pooled from 4 independent experiments were scored per condition. **E) and F)** IF micrographs of U-2 OS cells transfected or not with GFP-Gam1 for 24 hours, after which 1  $\mu\text{M}$  CPT was added for 1 hour. As only cells in S phase are sensitive to CPT, cells that did not respond to CPT are also presented. In **F)**, cells were cultured in BrdU-containing media prior to treatment. Shown are representative images from 3 **(E)** and 2 **(F)** independent experiments. **G) and H)** IF micrographs of U-2 OS cells stably expressing MRE11-GFP **(G)** or plain U-2 OS cells **(H)** pre-treated with 12  $\mu\text{M}$  GA or 0.025% DMSO for 1 hour, subjected to 10 Gy of IR or not, and

recovered for 2 hours in the presence of GA or DMSO. Left panel: representative images from at least 6 independent experiments. Center and right panels: quantifications of total foci intensity (pooled from 3 independent experiments;  $\geq 175$  cells per condition for MRE11-GFP,  $\geq 153$  cells per condition for NBS1) and foci count (1 experiment;  $\geq 114$  cells per condition for MRE11-GFP,  $\geq 103$  cells per condition for NBS1). In **G**), MRE11-GFP foci were quantified from MRE11-GFP foci-positive cells, whereas in **H**), NBS1 foci were quantified from all cells.

### **Supplemental Figure S2: Related to Figure 1**

**A**) U-2 OS cells stably expressing GFP-CtIP were treated with the indicated concentrations of CPT or HU for 4 hours and processed for IF staining. Shown are representative images from 2 independent experiments, and GFP-CtIP foci quantifications from 70 – 186  $\gamma$ H2AX<sup>+</sup> cells per condition from 1 experiment. All images were scaled evenly for brightness and contrast. **B**) U-2 OS cells stably expressing GFP-CtIP were pre-treated for 30 minutes with 10  $\mu$ M GA, then treated for 4 hours with 50 nM CPT or 2 mM HU in the presence of GA and processed for IF staining. Shown are representative images from 2 independent experiments, and GFP-CtIP foci quantifications from 75 – 123  $\gamma$ H2AX<sup>+</sup> cells per condition from 1 experiment. All images were scaled evenly for brightness and contrast.

### **Supplemental Figure S3: Related to Figure 2**

**A**) Immunoblot verifying the expression of His<sub>10</sub>-SUMO-2 in HeLa His<sub>10</sub>-SUMO-2 cells. **B**) HeLa cells expressing 10XHis-tagged SUMO-2 (His<sub>10</sub>-SUMO-2) or HeLa cells they were derived from (parent) were portioned into input and His PD fractions and processed accordingly. The His PD fraction was processed using buffers containing 20 mM imidazole, and the fraction loaded

represents 12X more of the starting amount of sample relative to the input. Shown is a representative result of 3 independent experiments. Corresponds to **Fig. 2B**. **C**) HeLa His<sub>10</sub>-SUMO-2 cells were treated with GA at the indicated concentrations for 2 hours, then portioned into input and His PD fractions and processed accordingly before SDS-PAGE and immunoblotting. Shown is a representative result of 3 independent experiments. **D**) Lysates from HeLa His<sub>10</sub>-SUMO-2 cells expressing FLAG-tagged wildtype CtIP (WT) or a C-terminal truncation mutant (D6) (see **Fig. S7A**) were blotted for CtIP or FLAG to demonstrate the specificity of the CtIP antibody for the CtIP C-terminus. Shown is a representative result of 3 independent experiments.

### Supplemental Figure S4: Related to Figure 3

For **A**), **C**), and **D**), HeLa His<sub>10</sub>-SUMO-2 cells were treated as indicated, portioned into input control and His PD fractions, processed accordingly for whole cell lysis or Ni-NTA affinity purification, then resolved by SDS-PAGE. **A**) Cells were subjected to 10 Gy of IR or not and allowed to recover for 1 hour. Corresponds to **Fig. 3A**. **B**) HeLa His<sub>10</sub>-SUMO-2 cells were synchronized by double thymidine block and released for either 3 (mid-S phase), 7 (early G<sub>2</sub> phase), or 11 hours (G<sub>1</sub> phase). The resulting cell lysates were blotted for the expression of His<sub>10</sub>-SUMO-2 and cell cycle markers (Geminin, for S phase; Cyclin A, for G<sub>2</sub> phase; Cyclin D1, for G<sub>1</sub> phase) (left panel). Right panel: the corresponding cell cycle profiles by DNA content analysis. **C**) HeLa His<sub>10</sub>-SUMO-2 cells were synchronized by double thymidine block and released for various timepoints to reach different cell cycle phases (0 h for the G<sub>1</sub>/S transition, 3 h for mid-S phase, 6 h for S and G<sub>2</sub> phases, 11 h for G<sub>1</sub> phase). **D**) Cells were left asynchronous or synchronized by double thymidine block with release for 2 (mid-S phase) or 12 hours (G<sub>1</sub> phase), after which they

were subjected to 10 Gy of IR or not and allowed to recover for 1 hour. Shown is a representative result of 2 independent experiments.

### Supplemental Figure S5: Related to Figure 4

**A)** Schematic diagrams of the domain structure of GFP-CtIP-WT and the internal deletion mutant  $\Delta 515-518$  along with relevant phosphorylation sites. “Tet”: tetramerization domain; “dimeriz”: dimerization domain; “nuclease”: endonuclease domain, “PCNA interaction”: also known as PIP-Box. **B)** Cells were treated as in **Fig. 4B** and processed for DNA content analysis. Shown are the means of 2 independent experiments. **C)** Lysates of HeLa His<sub>10</sub>-SUMO-2 cells treated for 2.5 hours in 0.1% DMSO, 25  $\mu$ M roscovitine, 2.5  $\mu$ M AZD5438, or 10  $\mu$ M RO-3306 were blotted for the phosphorylation of CDK substrates. Ser2 in the heptapeptide repeats of the RNA polymerase II subunit Rpb1 C-terminal domain (CTD) is phosphorylated by CDK9 (2), which is a target of roscovitine and AZD5438 (3, 4). Thr320 of protein phosphatase 1 alpha (PP1 $\alpha$ ) is phosphorylated by CDK1 (5), which is a target of AZD5438 and the target for RO-3306 (4, 6). **D)** Immunoblot of input and His PD fractions of HeLa His<sub>10</sub>-SUMO-2 cells transfected with empty vector GFP or GFP-CtIP-WT. **E)** Cells were treated as in **Fig. 4D** and processed for DNA content analysis. Shown are the means of 2 to 4 independent experiments. **F) - I)** Immunoblots of cells treated with 10  $\mu$ M KU-55933, 20  $\mu$ M ETP-46464, 20  $\mu$ M VE-821, or 1  $\mu$ M NU7441 for 1 hour, then supplemented with 25  $\mu$ M phleomycin (PHL) for 30 minutes (**F**) or 1 hour (**I**), or treated with 82 J/m<sup>2</sup> of ultraviolet light (UV) and recovered for 1 hour in their presence (**G, H**). **J)** Immunoblot of input and His PD fractions of HeLa His<sub>10</sub>-SUMO-2 cells synchronized to mid-S phase and transfected with GFP-CtIP-WT or substitution mutants at residue T859. Shown is a representative result of 3 independent experiments. \* indicates an exogenous CtIP immunoreactive band that is

not of interest; we speculate it is either lower molecular weight SUMO-2-modified CtIP, or unmodified tagged-CtIP retained in the His PD fraction due to overexpression.

#### **Supplemental Figure S6: Related to Figure 4**

**A)** U-2 OS cells were transfected with GFP-CtIP and either monomeric red fluorescent protein (RFP) empty vector or RFP-PCNA and processed for immunoprecipitation (IP) for the RFP tag. Prior to IP, a portion of lysate was saved as an input control. Shown is a representative result of at least 6 independent experiments. **B)** Chromatin fractionation experiment, with resulting soluble (S) or chromatin-enriched (P, pellet) fractions for U-2 OS cells stably expressing GFP-CtIP-WT, -K578R, -K896R, or - $\Delta$ 515-518, or the parental U-2 OS cells. Histone H2A and  $\alpha$ -tubulin serve as markers for the chromatin-enriched and soluble fractions, respectively.

#### **Supplemental Figure S7: Related to Figure 6**

**A)** Schematic diagrams of CtIP domain structure of FLAG-tagged wildtype (WT) CtIP and a panel of corresponding internal deletion mutants (D3 to D6); the regions deleted are denoted by the dotted line. Also indicated in the WT schematic are relevant phosphorylation and SUMOylation sites in this study. “Tet”: tetramerization domain; “dimeriz”: dimerization domain; “nuclease”: endonuclease domain, “PCNA interaction”: also known as PIP-Box. **B)** HeLa His<sub>10</sub>-SUMO-2 cells were synchronized to mid-S phase. 24 hours before harvest, they were transfected with FLAG-CtIP-WT or the internal deletion mutants D3, D4, D5, and D6, then portioned into input control and His PD fractions and processed accordingly. Shown is a representative result of 2 independent experiments. \* indicates a non-specific immunoreactive band. **C)** Asynchronous HeLa His<sub>10</sub>-SUMO-2 cells were transfected with GFP empty vector or the indicated GFP-CtIP

constructs, portioned into input control and His PD fractions, and processed accordingly. **D)** Asynchronous HeLa His<sub>10</sub>-SUMO-2 cells were transfected with the indicated HA-tagged CtIP constructs, portioned into input control and His pull-down (His PD) fractions, and processed accordingly. **E)** Clustal Omega (European Bioinformatics Institute, European Molecular Biology Laboratory) multiple sequence alignment was performed on the amino acid residue sequences of CtIP orthologues. The conserved lysine residue at K578 (in human CtIP) and the surrounding canonical SUMOylation motif are highlighted. \* indicates complete identity; : indicates conservative substitutions; - indicates the residue is absent.

### **Supplemental Figure S8: Related to Figure 7**

**A) and B)** Live cell time-lapse laser microirradiation experiments performed on U-2 OS cells depleted of endogenous CtIP with siRNA and transfected with siRNA-resistant GFP-CtIP-WT, -K578R, or - $\Delta$ 515-518. **A)** shows images representative of the results from at least 3 independent experiments; white arrows indicate the linear region of laser microirradiation. **B)** displays the mean relative fluorescence intensity at the microirradiated region of 24 – 48 cells sourced from 3 independent experiments. **C)** HEK293 cells depleted of endogenous CtIP by siRNA were transiently transfected with GFP empty vector or GFP-CtIP-WT or -K578R, then immunoprecipitated (IP) for GFP. Prior to IP, a portion of lysate was saved as an input control. SDS-PAGE and immunoblotting were then performed on both input and IP fractions. The blots displayed are representative of at least 2 independent experiments. **D) and E)** Coomassie Brilliant Blue-stained SDS-PAGE gels showing purification of CtIP-WT- and -K578R or their phosphorylated versions (pCtIP) (**D)** or the MRN complex (**E)** from Sf9 cells. MW: molecular

weight standards. **F)** *In vitro* MRN endonuclease assay utilizing the products of **D)** and **E)** on a 5'-labeled streptavidin (S)-blocked 70 base pair (bp) double-stranded DNA substrate.

### **Supplemental Figure S9: K578 is Not Required for CtIP Recruitment During Replication Stress or its Interaction with PCNA**

**A)** Stable cell lines expressing GFP-CtIP-WT, -K578R, or  $\Delta$ 515-518 were transfected with siRNA to CtIP and then treated or not with HU for 4 hours, then processed for IF staining. Left panel: representative images of the results from 4 independent experiments. Right panel: 826 to 1678 cells (for all except the untreated condition, these were  $\gamma$ H2AX<sup>+</sup> cells) from 83 to 86 fields of view from 4 independent replicates were scored for the appearance of GFP-CtIP foci. **B)** U-2 OS cells were depleted of endogenous CtIP by siRNA and transfected with RFP-PCNA and either GFP empty vector or siRNA-resistant GFP-CtIP-WT or -K578R. A portion of lysate was saved as an input control, after which the remainder was processed for IP of the GFP tag. The result shown is representative of at least 4 independent experiments. **C)** U-2 OS cells stably expressing GFP-CtIP-WT or -K578R were depleted of endogenous CtIP by siRNA, then transfected with either RFP-PCNA or RFP empty vector and processed for IP of the RFP tag. Prior to IP, a portion of lysate was saved as an input control. The result shown is representative of at least 4 independent experiments. In the IP fraction, the RFP empty vector pulled down is 57.6% of the amount of RFP-PCNA-WT and -K578R pulled down. **D)** U-2 OS cells were co-transfected with RFP-PCNA and GFP-CtIP-WT, -K578R, or  $\Delta$ 515-518 and processed for IP of the RFP tag. Prior to IP, a portion of lysate was saved as an input control. The result shown is representative of 2 independent experiments. **E)** U-2 OS cells stably expressing GFP-CtIP-WT or -K578R were depleted of endogenous CtIP by siRNA then treated for 4 hours with 2 or 8 mM HU or 0.8% H<sub>2</sub>O (vehicle



control). U-2 OS cells without siRNA treatment and transfected with GFP empty vector served as a control sample. A portion of lysate was saved as an input control, after which the remainder was processed for IP of the GFP tag to detect co-immunoprecipitation of endogenous PCNA. The result shown is representative of 2 independent experiments.

### Supplemental Figure S10: Related to Figure 8

**A)** Top panel: Labeling protocol for all DNA fiber experiments performed: cells were pulse-labeled with 5-chloro-2'-deoxyuridine (CldU) for 30 minutes, then with 5-iodo-2'-deoxyuridine (IdU) for 30 minutes, then treated with 2 mM HU for 4 hours to promote fork stalling. Bottom panel: a typical image of gravity-spread DNA fibers used for quantification of the IdU (labeled in red) / CldU (labeled in green) tract length ratio. **B)** IdU/CldU ratio scatterplot of spread DNA fibers from U-2 OS cells transfected with non-targeting siRNA (siCTRL) or siRNA directed to UBC9 (siUBC9) and treated according to **A)**. 210 to 222 fibers per condition were sourced from 2 independent experiments. **C)** HeLa His<sub>10</sub>-SUMO-2 cells were transfected with the indicated GFP-CtIP constructs during synchronization to mid-S phase, then harvested. Cell pellets were portioned into input control and His PD fractions and processed accordingly. Shown is a representative result of at least 2 independent experiments. \* indicates an exogenous CtIP immunoreactive band that is not of interest; we speculate it is either lower molecular weight SUMO-2-modified CtIP, or unmodified tagged-CtIP retained in the His PD fraction due to overexpression. **D)** Left panel: Coomassie Brilliant Blue-stained SDS-PAGE gel showing purification of DNA2 from *Sf9* cells. Right panel: *in vitro* endonuclease assay utilizing DNA2 or phosphorylated (pCtIP) or not WT- or K578R-CtIP (**Fig. S8D**) on a 5'-labeled flap DNA substrate.

DNA2 activity was used as a positive control for nuclease activity. MW: molecular weight standards.

## SUPPLEMENTAL TABLES

Supplemental Table S1: siRNAs Used in This Study

| Target                 | Sense Sequence (5'-3') | Manufacturer    | Reference |
|------------------------|------------------------|-----------------|-----------|
| CtIP                   | GCUAAAACAGGAACGAAUC    | Millipore Sigma | (7)       |
| PIAS1                  | GGAUCAUUCUAGAGCUUUA    | Millipore Sigma | (8)       |
| PIAS4                  | GGAGUAAGAGUGGACUGAA    | Millipore Sigma | (8)       |
| CBX4                   | GUACUACUACCAGCUCAACUU  | Millipore Sigma | (7, 9)    |
| UBC9                   | CAAAAAAUCCCGAUGGCAC    | Millipore Sigma | (10)      |
| Negative Control siRNA | N/A                    | Qiagen          | #1022076  |

**Supplemental Table S2: Primers for Site-Directed Mutagenesis**

| <b>Mutant</b>              | <b>Template</b>     | <b>Source for Template</b> | <b>Primer Sequences (5'-3')</b>                                                                                                                 | <b>Kit Used</b> |
|----------------------------|---------------------|----------------------------|-------------------------------------------------------------------------------------------------------------------------------------------------|-----------------|
| GFP-CtIP-T859A             | GFP-CtIP-WT         | (7)                        | Forward:CTTTCCATACAAGTCTGAGCGGAAGGAAAAC<br>CAACTTCC<br>Reverse:GGAAGTTGGTTTTTCCTTCCGCTCAGACTTGTA<br>TGGAAAG                                     | QC              |
| GFP-CtIP-T859E             | GFP-CtIP-WT         | (7)                        | Forward:AATATAACCTCTTTCCATACAAGTCTGCTCG<br>GAAGGAAAACCAACTTCCCAAAAATT<br>Reverse:AATTTTTGGGAAGTTGGTTTTTCCTTCCGAGCA<br>GACTTGTATGGAAAGAGGTTATATT | QC              |
| GFP-CtIP-Δ515-518          | GFP-CtIP-WT         | (7)                        | Forward:GTGACTCTTTATGAGGCTTTG<br>Reverse:GTTTTTAGAAGTCTCACTTCC                                                                                  | Q5              |
| GFP-CtIP-K578R             | GFP-CtIP-WT         | (7)                        | Forward:GACAGCATTTTCTTCTTATTTGTAATGATG<br>GTTTATTGTCTGGAGA<br>Reverse:TCTCCAGACAATAAACCATCATTACAAATAA<br>GAGAAGAAAATGCTGTC                      | QC              |
| HA-CtIP-K578R              | pICE-HA-CtIP-siR-WT | Addgene #82030             | Forward:ATTACAAATAAGAGAAGAAAATGCTG<br>Reverse:GATGGTTTATTGTCTGGAG                                                                               | Q5              |
| GFP-CtIP-K578R-K896R       | GFP-CtIP-K896R      | (7)                        | Forward:ATTACAAATAAGAGAAGAAAATGCTG<br>Reverse:GATGGTTTATTGTCTGGAG                                                                               | Q5              |
| GFP-CtIP-7KR-R578K         | GFP-CtIP-7KR        | (7)                        | Forward:TTACAAATAAAAGAAGAAAATGCTG<br>Reverse: TGATGGTTTATTGTCTGG                                                                                | Q5              |
| GFP-CtIP-N181A             | GFP-CtIP-WT         | (7)                        | Forward:AAGAAAGGAGGCCCCCCATGTCCGATAC<br>Reverse: CGTAGCCGGTTAACGCCA                                                                             | Q5              |
| GFP-CtIP-N181A-K578R       | GFP-CtIP-K578R      | generated for this report  | Forward:AAGAAAGGAGGCCCCCCATGTCCGATAC<br>Reverse: CGTAGCCGGTTAACGCCA                                                                             | Q5              |
| GFP-CtIP-N289A-H290A       | GFP-CtIP-WT         | (7)                        | Forward:TCTGGAAGGAGCTGCCAAGAAACAGCCTTTT<br>GAG<br>Reverse:CAGTGGTAGAGCTCATCAC                                                                   | Q5              |
| GFP-CtIP-N289A-H290A-K578R | GFP-CtIP-K578R      | generated for this report  | Forward:TCTGGAAGGAGCTGCCAAGAAACAGCCTTTT<br>GAG<br>Reverse:CAGTGGTAGAGCTCATCAC                                                                   | Q5              |

Primers were custom synthesized by Millipore Sigma.

QC: Quikchange II XL Site Directed Mutagenesis Kit (Agilent)

Q5: Q5 Site-Directed Mutagenesis Kit (New England Biolabs)

**Supplemental Table S3: Primers for DNA Sequencing**

| <b>Primer</b>     | <b>Primer Sequence (5'-3')</b> |
|-------------------|--------------------------------|
| CtIP 199 Forward  | AGGGAACAGCAGAAAGTCCT           |
| CtIP 692 Reverse  | CTTTGGTCATAAGTGTCAGCTAC        |
| CtIP 1523 Reverse | CCTTGGCTTTTCTCTTGACG           |
| CtIP 1973 Forward | ATCCGGGAGCAGACCTTTC            |
| CtIP 2289 Reverse | AGTGTGTAGTTTCTTTGTGGCA         |
| CtIP 2409 Forward | GGAGAGAAGAAAAGCTGCTGGG         |

Primers were custom synthesized by Millipore Sigma.

**Supplemental Table S4: Primary Antibodies**

| Antigen                                          | Host   | Manufacturer                          | Catalogue Number | Application               |
|--------------------------------------------------|--------|---------------------------------------|------------------|---------------------------|
| $\beta$ -Actin                                   | rabbit | Millipore Sigma                       | A5060            | IB (1:5000)               |
| Phospho-ATM at S1981                             | mouse  | Active Motif                          | 39529            | IB (1:2500)               |
| BRCA1                                            | rabbit | Bethyl Laboratories                   | A301-377A        | IB (1:3000)               |
| BrdU                                             | mouse  | GE Healthcare /<br>Millipore Sigma    | GERPN202         | IF (1:750)                |
| BrdU (for CldU)                                  | rat    | Abcam                                 | ab6326           | Fiber (1:100)             |
| BrdU (for IdU)                                   | mouse  | BD Biosciences                        | 347580           | Fiber (1:100)             |
| CBX4                                             | rabbit | Atlas Antibodies /<br>Millipore Sigma | HPA008228        | IB (1:2000)               |
| Phospho-Chk1 at S345                             | rabbit | Cell Signaling Technology             | 2348             | IB (1:4000)               |
| Phospho-Chk2 at T68                              | rabbit | Cell Signaling Technology             | 2197             | IB (1:1000)               |
| CtIP                                             | mouse  | Active Motif                          | 61141            | IB (1:16000)              |
| CtIP                                             | rabbit | Abcam                                 | ab155988         | IB (1:16000)              |
| Cyclin A                                         | rabbit | Santa Cruz Biotechnology              | sc-751           | IB (1:1000)               |
| Cyclin D1                                        | rabbit | Santa Cruz Biotechnology              | sc-718           | IB (1:1000)               |
| Phospho-DNA-PKcs at<br>S2056                     | rabbit | Abcam                                 | ab18192          | IB (1:3000)               |
| EXO1                                             | rabbit | Bethyl Laboratories                   | A302-640A        | IB (1:2000)               |
| FLAG tag                                         | mouse  | Sigma                                 | F1804            | IB (1:2000)               |
| Geminin                                          | rabbit | Cell Signaling Technology             | 5165             | IB (1:1000)               |
| GFP                                              | mouse  | Santa Cruz Biotechnology              | sc-9996          | IB (1:2000)               |
| HA tag                                           | mouse  | BioLegend                             | 901501           | IB (1:1000)               |
| His-probe                                        | mouse  | Santa Cruz Biotechnology              | sc-8036          | IB (1:500)                |
| Histone H2A                                      | rabbit | Upstate / Millipore Sigma             | 07-146           | IB (1:2000)               |
| Phospho-Histone H2AX<br>at S139 ( $\gamma$ H2AX) | rabbit | Active Motif                          | 39118            | IF (1:2000)               |
| Phospho-Histone H2AX<br>at S139 ( $\gamma$ H2AX) | mouse  | Millipore Sigma                       | 05-636-I         | IF (1:2000)               |
| I-SceI                                           | rabbit | Abcam                                 | ab216263         | IB (1:1000)               |
| MRE11                                            | mouse  | GeneTex                               | GTX70212         | IB (1:3000)               |
| NBS1                                             | rabbit | Novus Biologicals                     | NB100-143        | IB (1:6000)<br>IF (1:500) |
| PCNA                                             | mouse  | Santa Cruz Biotechnology              | sc-56            | IB (1:2000)               |
| PIAS1                                            | rabbit | Abcam                                 | ab32219          | IB (1:1000)               |
| PIAS4                                            | rabbit | Abcam                                 | ab58416          | IB (1:3000)               |
| Phospho-PP1 $\alpha$ at T320                     | rabbit | Abcam                                 | ab62334          | IB (1:30000)              |
| RAD50                                            | mouse  | Abcam                                 | ab89             | IB (1:4000)               |
| RAD51                                            | rabbit | Santa Cruz Biotechnology              | sc8349           | IF (1:200)                |
| RanGAP-1                                         | mouse  | ThermoFisher Scientific               | 33-0800          | IB (1:1000)               |
| Phospho-Rpb1-CTD at<br>S2                        | mouse  | BioLegend                             | 920204           | IB (1:1000)               |

|                   |        |                           |           |              |
|-------------------|--------|---------------------------|-----------|--------------|
| RFP               | rabbit | Abcam                     | ab62341   | IB (1:2000)  |
| RPA2              | mouse  | Abcam                     | ab2175    | IF (1:2000)  |
| SUMO-2/3          | mouse  | Cytoskeleton              | ASM23     | IB (1:2500)  |
| $\alpha$ -Tubulin | mouse  | GeneTex                   | GTX628802 | IB (1:10000) |
| $\alpha$ -Tubulin | mouse  | Millipore Sigma           | T6074     | IB (1:10000) |
| $\alpha$ -Tubulin | mouse  | Millipore Sigma           | T6199     | IB (1:5000)  |
| UBC9              | rabbit | Cell Signaling Technology | 4786      | IB (1:2000)  |

IB: immunoblot; IF: immunofluorescence; Fiber: DNA fiber assay

**Supplemental Table S5: Secondary Antibodies**

| <b>Antibody Conjugate</b>          | <b>Manufacturer</b>     | <b>Catalogue Number</b> | <b>Application</b> |
|------------------------------------|-------------------------|-------------------------|--------------------|
| chicken anti-rat—Alexa Fluor 488   | ThermoFisher Scientific | A-21470                 | Fiber (1:300)      |
| goat anti-mouse—Alexa Fluor 546    | ThermoFisher Scientific | A-21123                 | Fiber (1:300)      |
| goat anti-mouse—HRP                | LI-COR                  | 926-80010               | IB (1:5000)        |
| goat anti-rabbit—HRP               | LI-COR                  | 926-80011               | IB (1:5000)        |
| donkey anti-mouse—IRDye 680RD      | LI-COR                  | 926-68072               | IB (1:20000)       |
| donkey anti-rabbit—IRDye 680RD     | LI-COR                  | 926-68073               | IB (1:20000)       |
| donkey anti-mouse—IRDye 800CW      | LI-COR                  | 926-32212               | IB (1:20000)       |
| donkey anti-rabbit—IRDye 800CW     | LI-COR                  | 926-32213               | IB (1:20000)       |
| donkey anti-mouse—Alexa Fluor 488  | ThermoFisher Scientific | A-21202                 | IF (1:1000)        |
| donkey anti-mouse—Alexa Fluor 594  | ThermoFisher Scientific | A-21203                 | IF (1:1000)        |
| donkey anti-rabbit—Alexa Fluor 594 | ThermoFisher Scientific | A-21207                 | IF (1:1000)        |
| donkey anti-rabbit—Alexa Fluor 647 | ThermoFisher Scientific | A-31573                 | IF (1:300)         |
| goat anti-mouse—Alexa Fluor 647    | Abcam                   | ab150115                | IF (1:300)         |

HRP: horseradish peroxidase; IB: immunoblot; IF: immunofluorescence; Fiber: DNA fiber assay



**Supplemental Table S6: Extraction Buffers for Immunofluorescence Staining**

| <b>Molecule</b>                         | <b>Buffer Composition</b>                                                                                                          | <b>Conditions</b>                              |
|-----------------------------------------|------------------------------------------------------------------------------------------------------------------------------------|------------------------------------------------|
| GFP-CtIP,<br>RAD51, RPA,<br>Native BrdU | 25 mM HEPES pH 7.9, 300 mM sucrose,<br>50 mM NaCl, 1 mM EDTA, 3 mM MgCl <sub>2</sub> ,<br>0.5% Triton X-100                        | ice-cold<br>2 times,<br>3 minutes each         |
| MRE11-GFP                               | 20 mM HEPES pH 7.5, 20 mM NaCl, 5 mM MgCl <sub>2</sub> ,<br>0.5% Nonidet P-40                                                      | ice-cold<br>2 times,<br>3 minutes each         |
| NBS1                                    | 10 mM HEPES pH 7.0, 300 mM sucrose,<br>100 mM NaCl, 3 mM MgCl <sub>2</sub> , 0.7% Triton X-100,<br>0.3 mg/mL RNase A (added fresh) | room temperature<br>2 times,<br>5 minutes each |

**SUPPLEMENTAL REFERENCES**

1. Pierce,A.J., Johnson,R.D., Thompson,L.H. and Jasin,M. (1999) XRCC3 promotes homology-directed repair of DNA damage in mammalian cells. *Genes Dev.*, **13**, 2633–2638.
2. Bowman,E.A. and Kelly,W.G. (2014) RNA polymerase II transcription elongation and Pol II CTD Ser2 phosphorylation: A tail of two kinases. *Nucleus*, **5**, 224–236.
3. Bach,S., Knockaert,M., Reinhardt,J., Lozach,O., Schmitt,S., Baratte,B., Koken,M., Coburn,S.P., Tang,L., Jiang,T., *et al.* (2005) Roscovitine targets, protein kinases and pyridoxal kinase. *J. Biol. Chem.*, **280**, 31208–31219.
4. Byth,K.F., Thomas,A., Hughes,G., Forder,C., McGregor,A., Geh,C., Oakes,S., Green,C., Walker,M., Newcombe,N., *et al.* (2009) AZD5438, a potent oral inhibitor of cyclin-dependent kinases 1, 2, and 9, leads to pharmacodynamic changes and potent antitumor effects in human tumor xenografts. *Mol. Cancer Ther.*, **8**, 1856–1866.
5. Dohadwala,M., da Cruz e Silva,E.F., Hall,F.L., Williams,R.T., Carbonaro-Hall,D.A., Nairn,A.C., Greengard,P. and Berndt,N. (1994) Phosphorylation and inactivation of protein phosphatase 1 by cyclin-dependent kinases. *Proc. Natl. Acad. Sci. U. S. A.*, **91**, 6408–6412.
6. Vassilev,L.T., Tovar,C., Chen,S., Knezevic,D., Zhao,X., Sun,H., Heimbrosk,D.C. and Chen,L. (2006) Selective small-molecule inhibitor reveals critical mitotic functions of human CDK1. *Proc. Natl. Acad. Sci. U. S. A.*, **103**, 10660–10665.
7. Soria-Bretones,I., Cepeda-Garcia,C., Checa-Rodriguez,C., Heyer,V., Reina-San-Martin,B., Soutoglou,E., Huertas,P., Cepeda-García,C., Checa-Rodriguez,C., Heyer,V., *et al.* (2017) DNA end resection requires constitutive sumoylation of CtIP by CBX4. *Nat. Commun.*, **8**, 113.
8. Galanty,Y., Belotserkovskaya,R., Coates,J., Polo,S., Miller,K.M. and Jackson,S.P. (2009)

Mammalian SUMO E3-ligases PIAS1 and PIAS4 promote responses to DNA double-strand breaks. *Nature*, **462**, 935–939.

9. Sakamoto, Y., Watanabe, S., Ichimura, T., Kawasuji, M., Koseki, H., Baba, H. and Nakao, M. (2007) Overlapping roles of the methylated DNA-binding protein MBD1 and polycomb group proteins in transcriptional repression of HOXA genes and heterochromatin foci formation. *J. Biol. Chem.*, **282**, 16391–16400.
10. Lin, X., Liang, M., Liang, Y.-Y., Brunicardi, F.C. and Feng, X.-H. (2003) SUMO-1/Ubc9 promotes nuclear accumulation and metabolic stability of tumor suppressor Smad4. *J. Biol. Chem.*, **278**, 31043–31048.

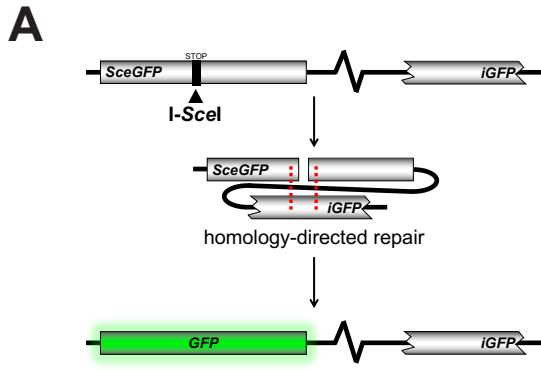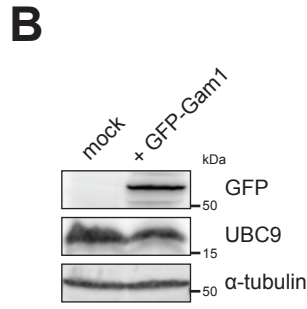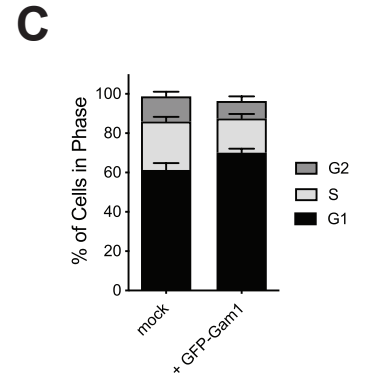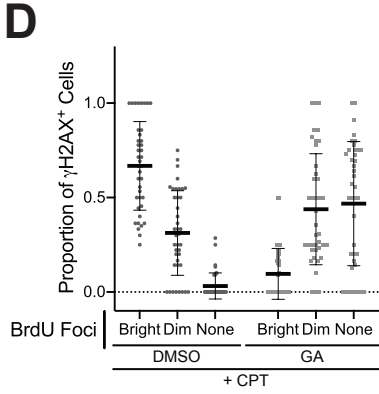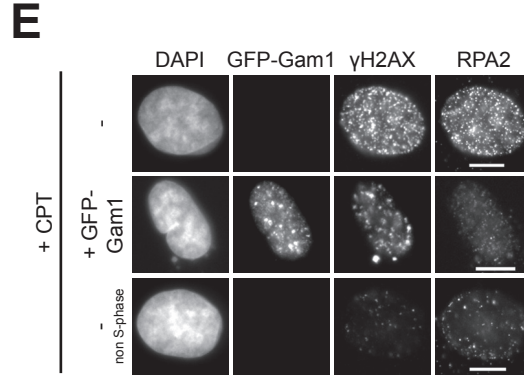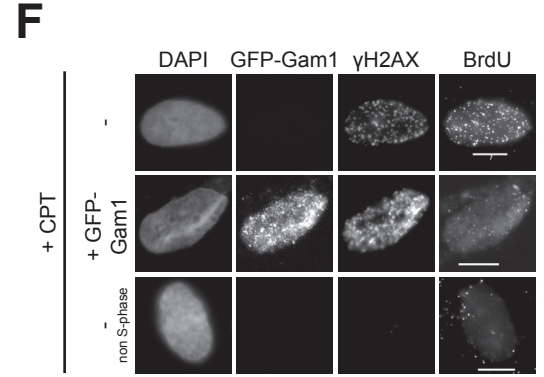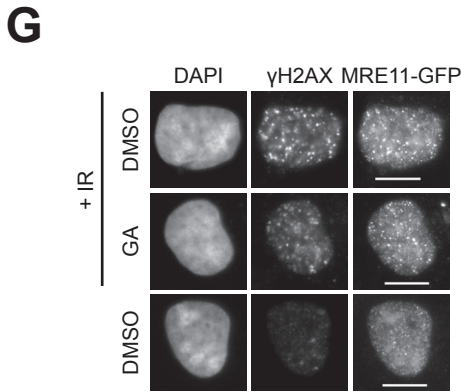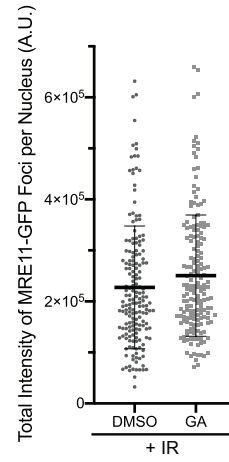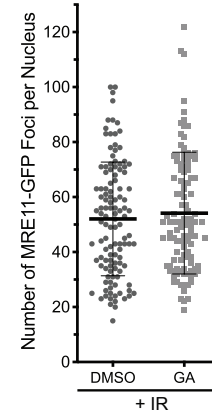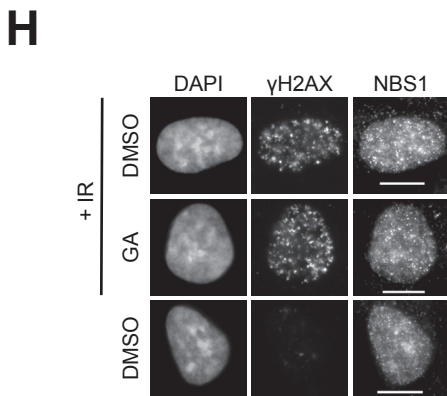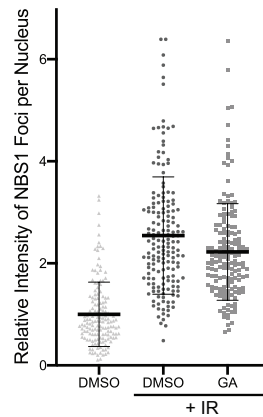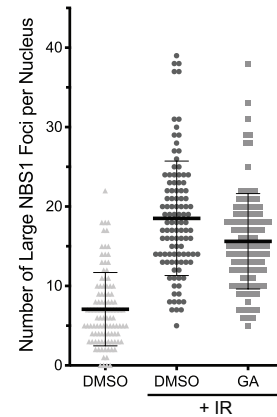

**A**

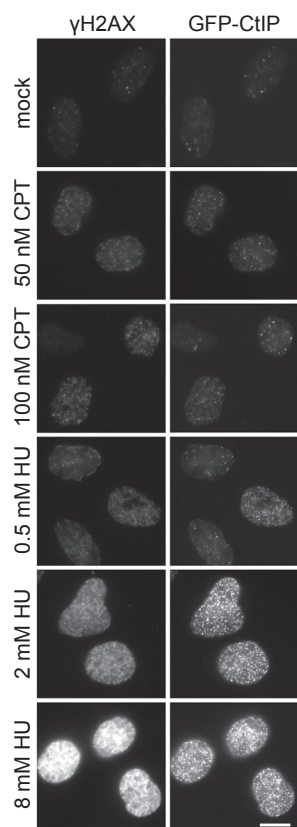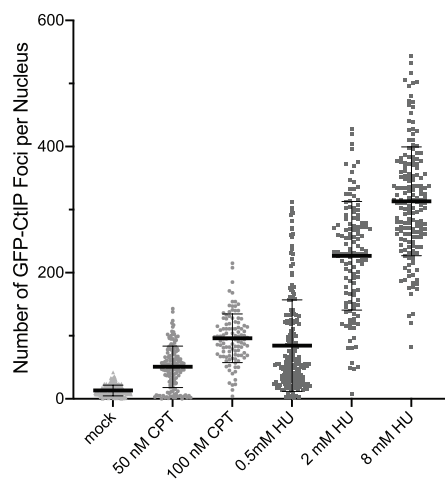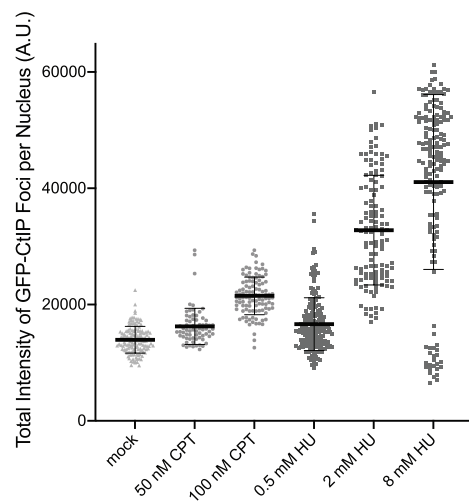

**B**

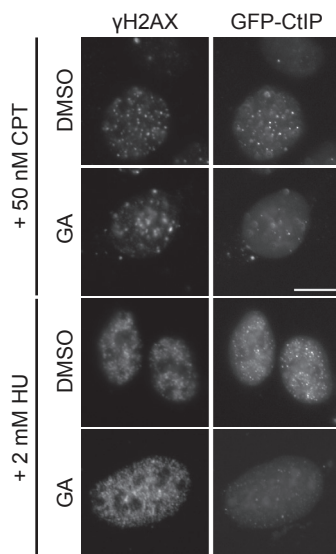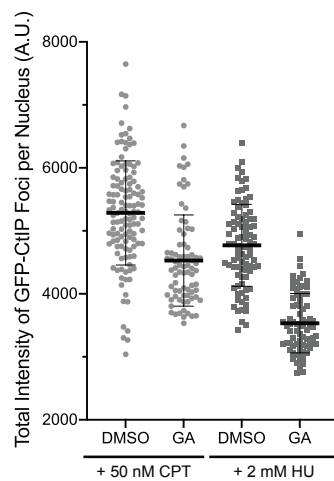

**A**

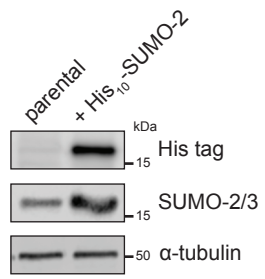

**C**

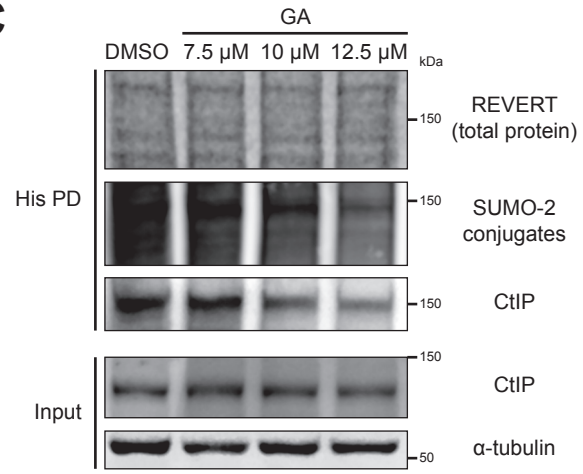

**B**

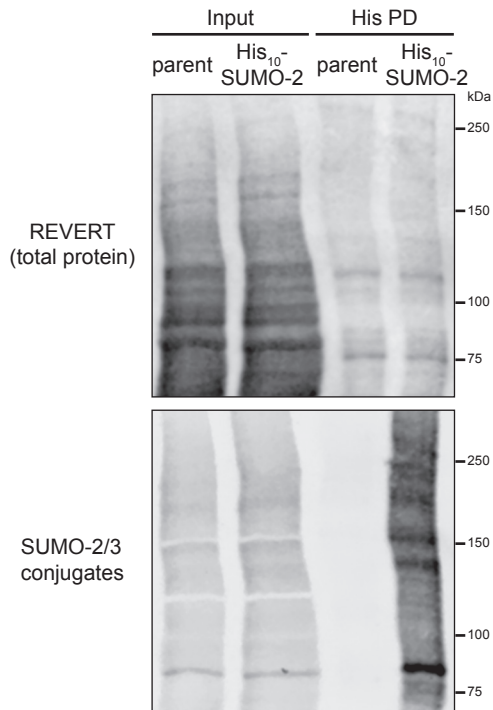

**D**

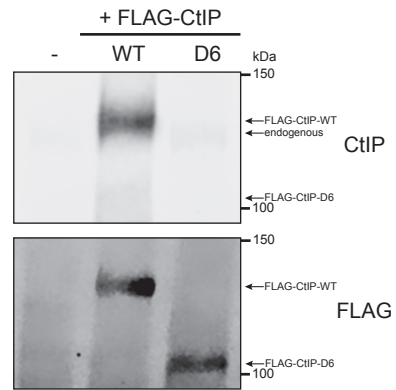

**A**

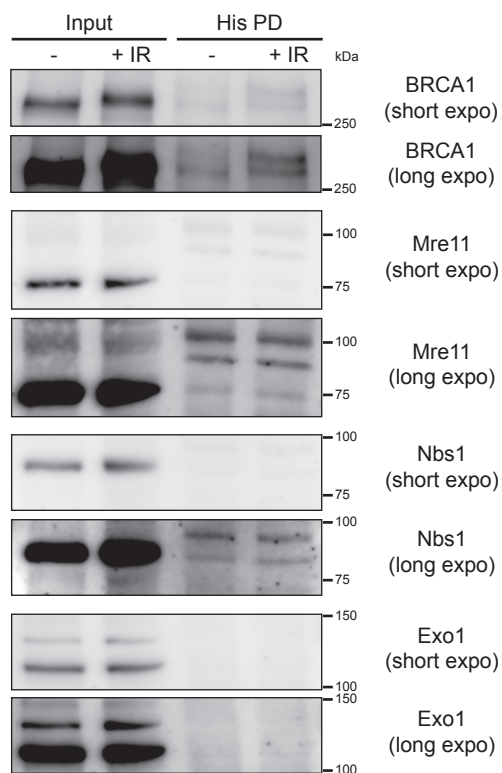

**B**

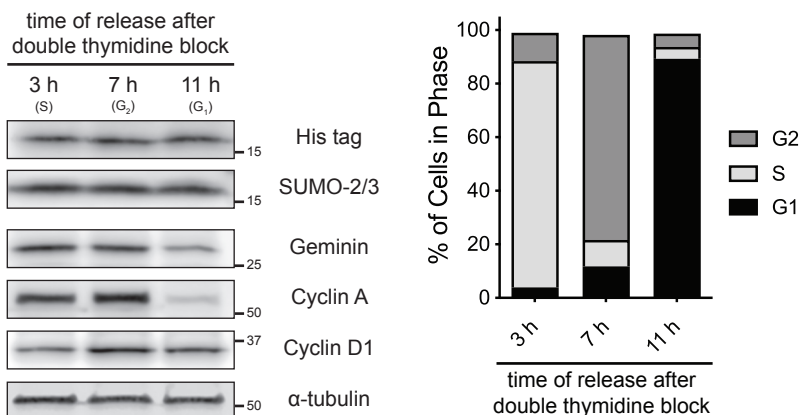

**C**

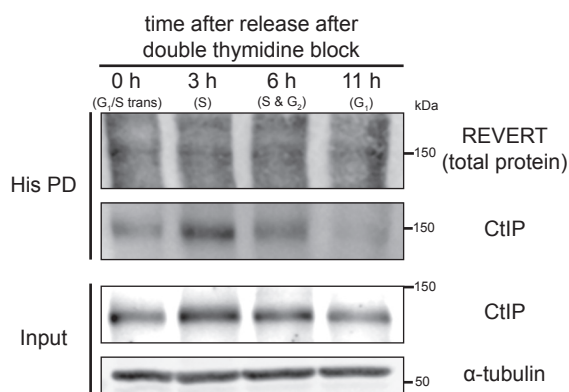

**D**

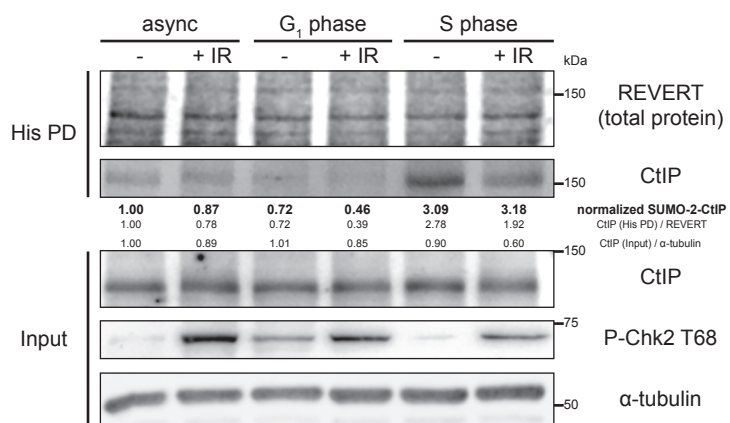

**A**

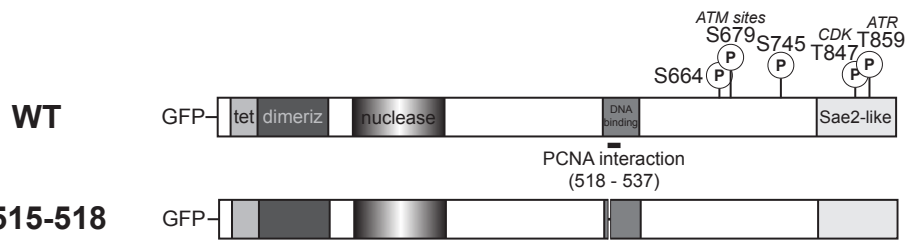

**B**

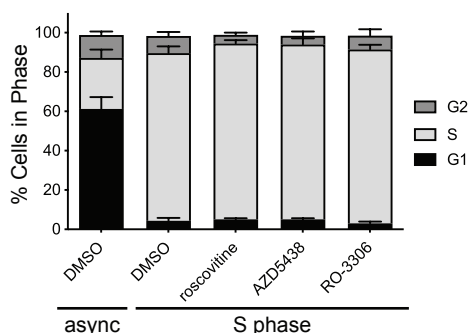

**C**

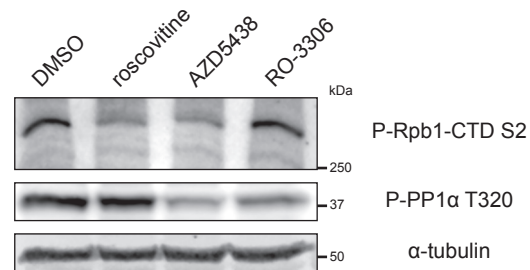

**D**

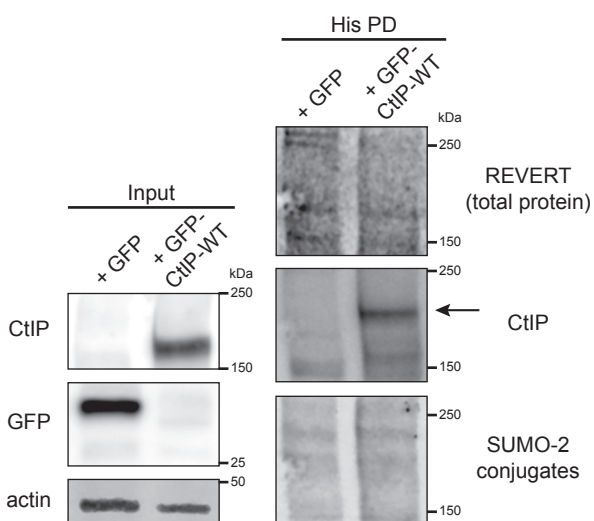

**E**

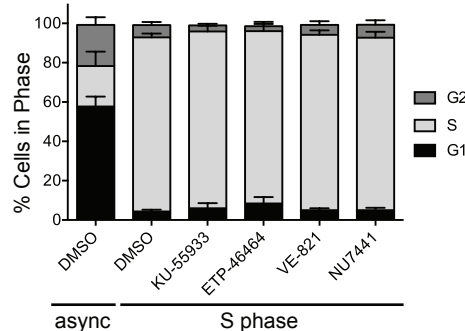

**F**

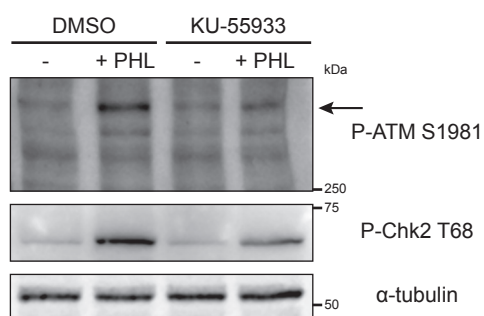

**G**

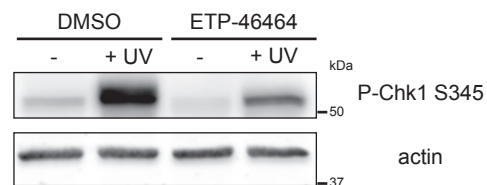

**H**

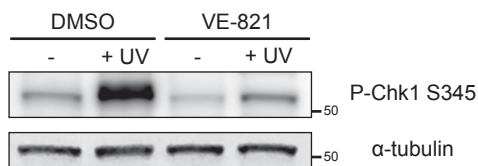

**I**

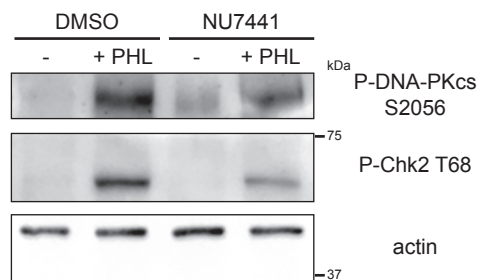

**J**

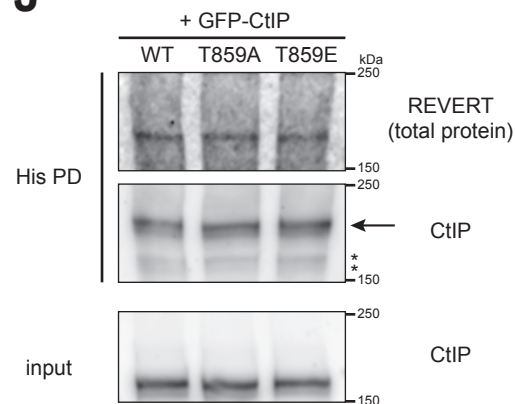





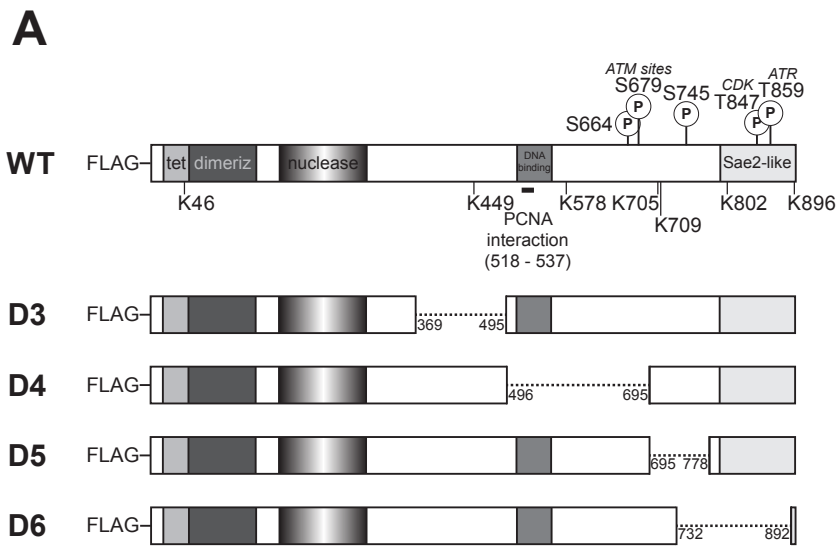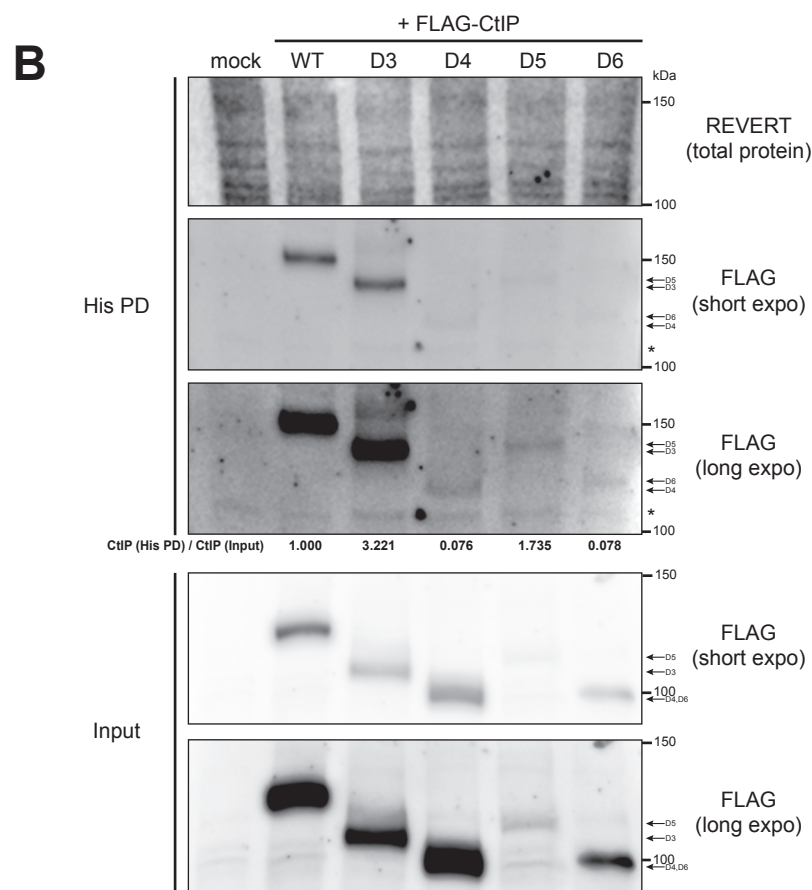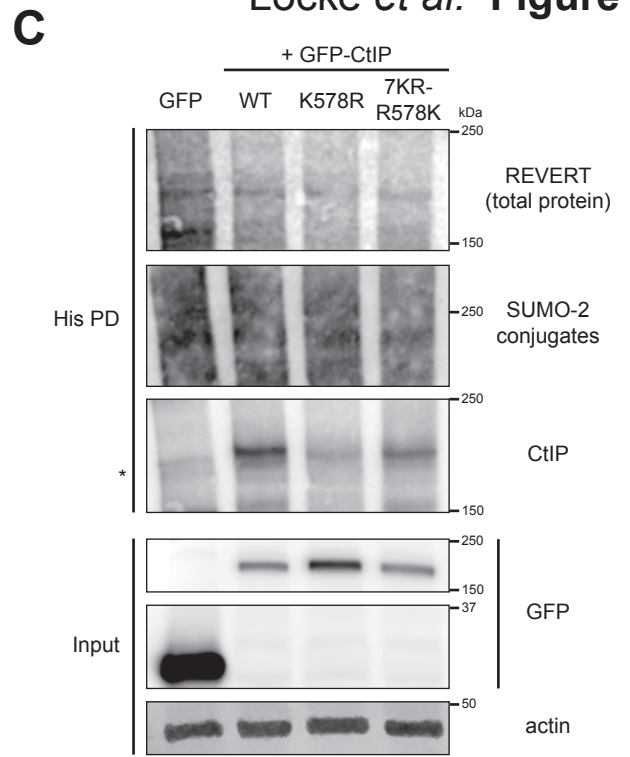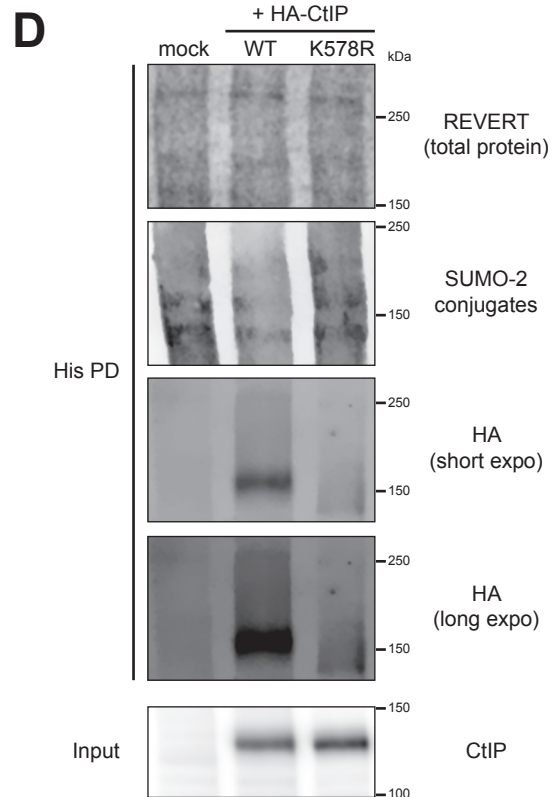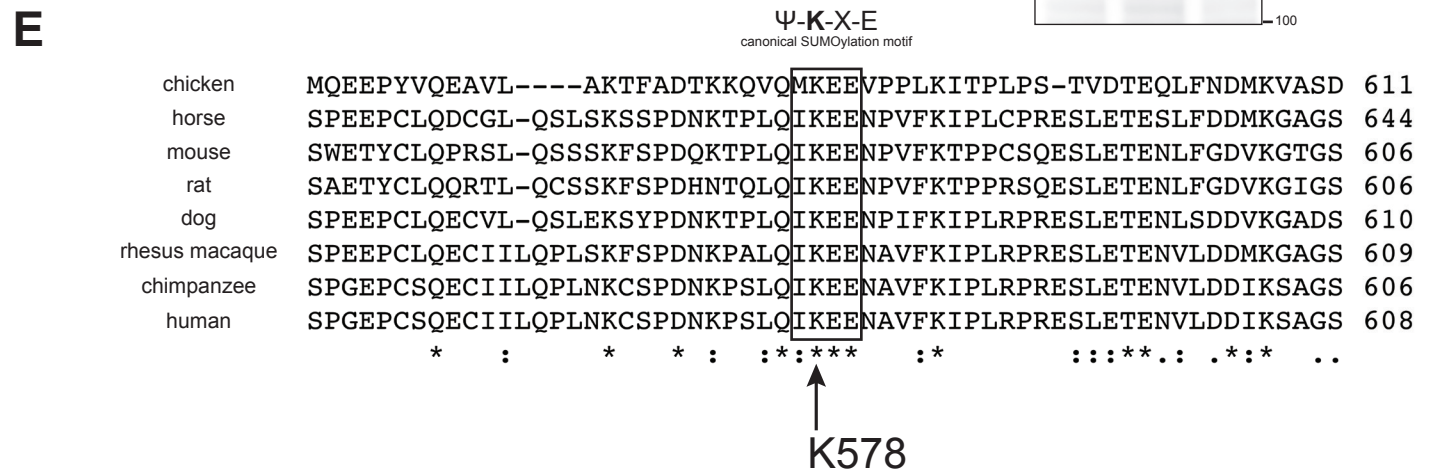

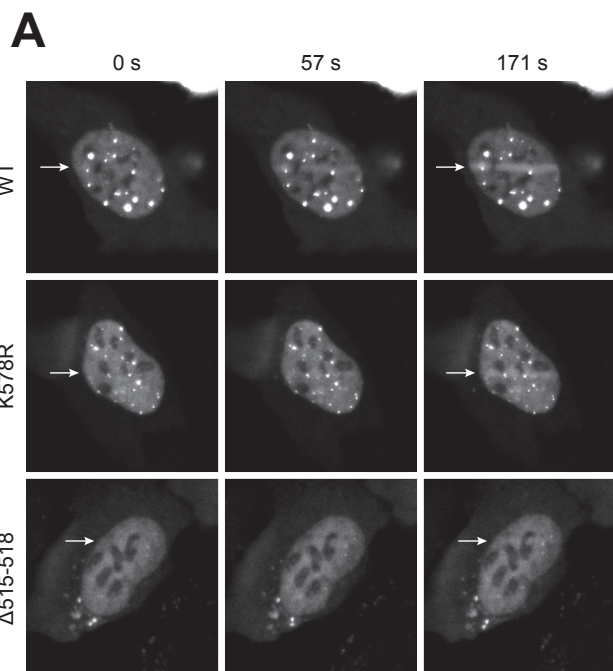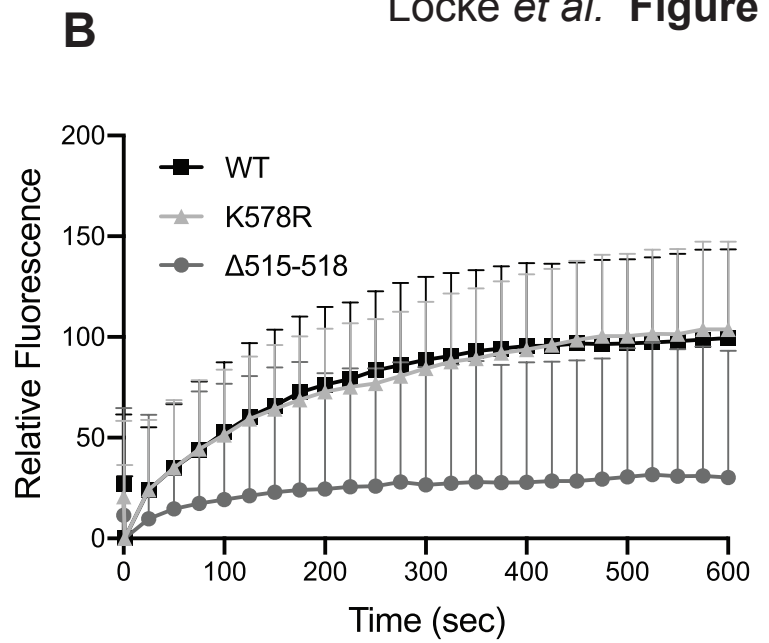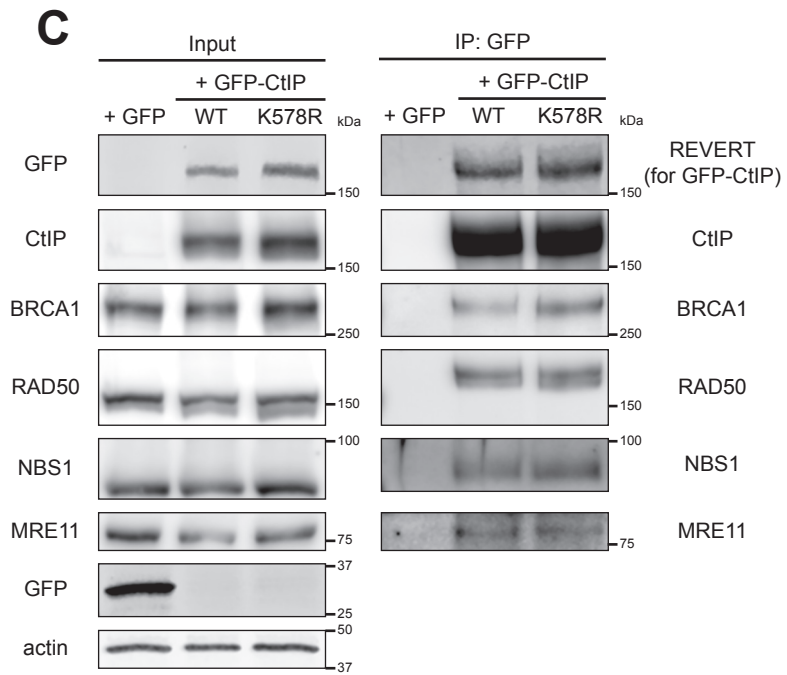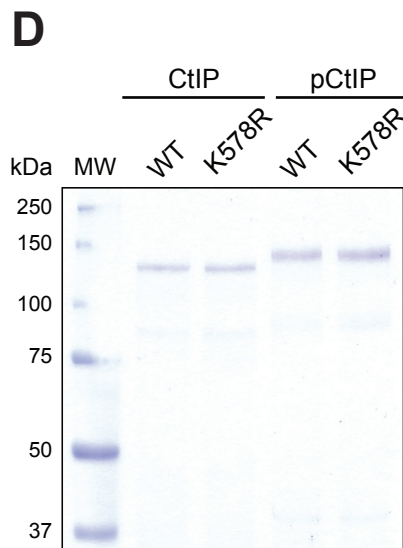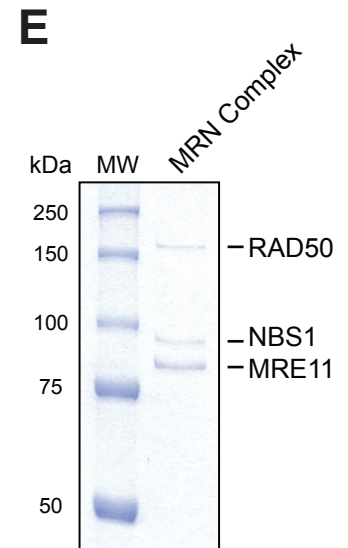

**F**

|                  |   |   |    |    |    |    |    |    |    |    |    |    |    |    |
|------------------|---|---|----|----|----|----|----|----|----|----|----|----|----|----|
| MRN (20 nM)      | - | + | +  | +  | -  | +  | +  | -  | +  | +  | -  | +  | +  | -  |
| CtIP-WT (nM)     | 0 | 0 | 30 | 60 | 60 | 0  | 0  | 0  | 0  | 0  | 0  | 0  | 0  | 0  |
| pCtIP-WT (nM)    | 0 | 0 | 0  | 0  | 0  | 30 | 60 | 60 | 0  | 0  | 0  | 0  | 0  | 0  |
| CtIP-K578R (nM)  | 0 | 0 | 0  | 0  | 0  | 0  | 0  | 0  | 30 | 60 | 60 | 0  | 0  | 0  |
| pCtIP-K578R (nM) | 0 | 0 | 0  | 0  | 0  | 0  | 0  | 0  | 0  | 0  | 0  | 30 | 60 | 60 |

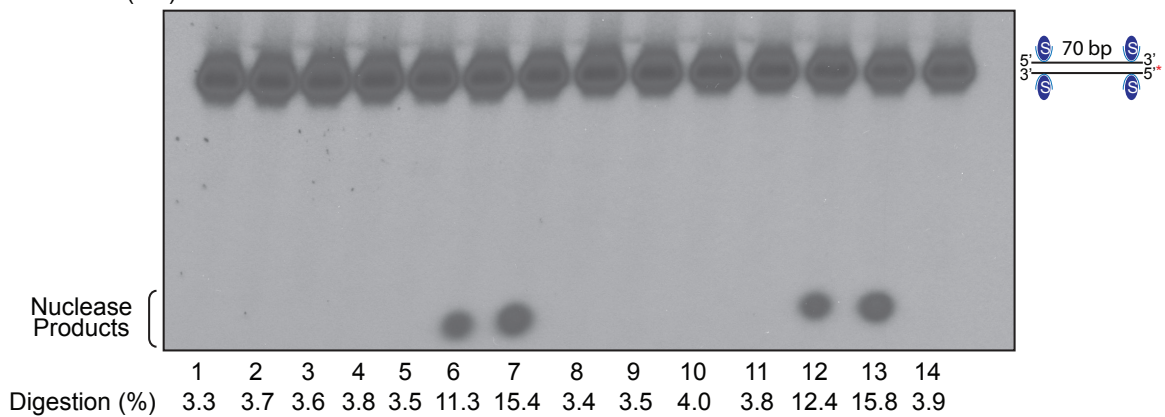

**A**

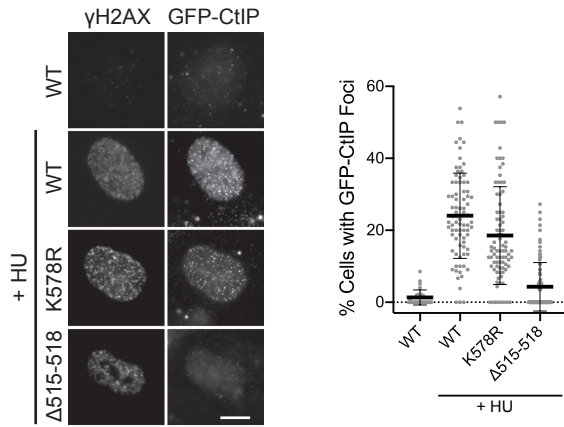

**B**

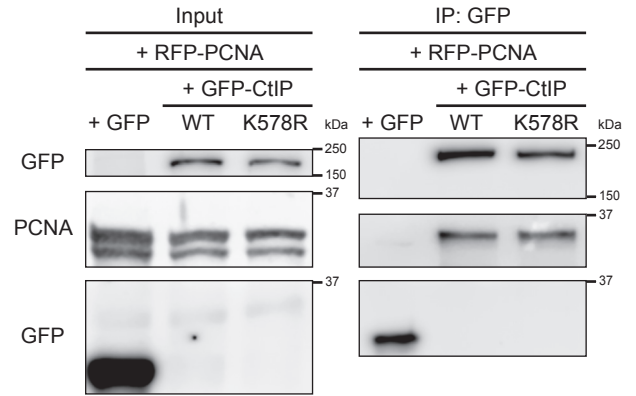

**C**

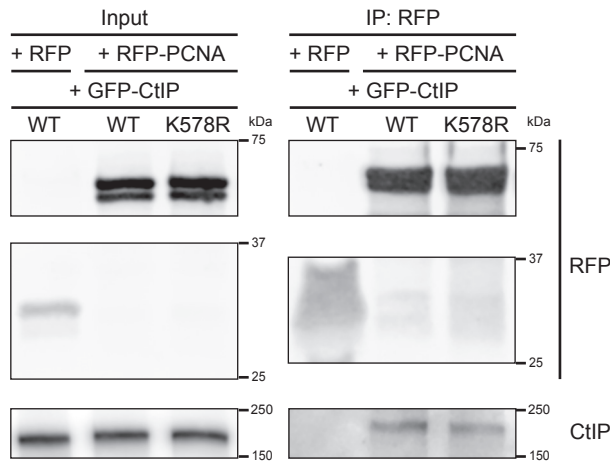

**D**

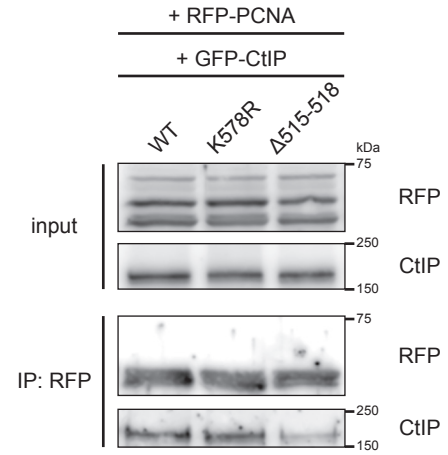

**E**

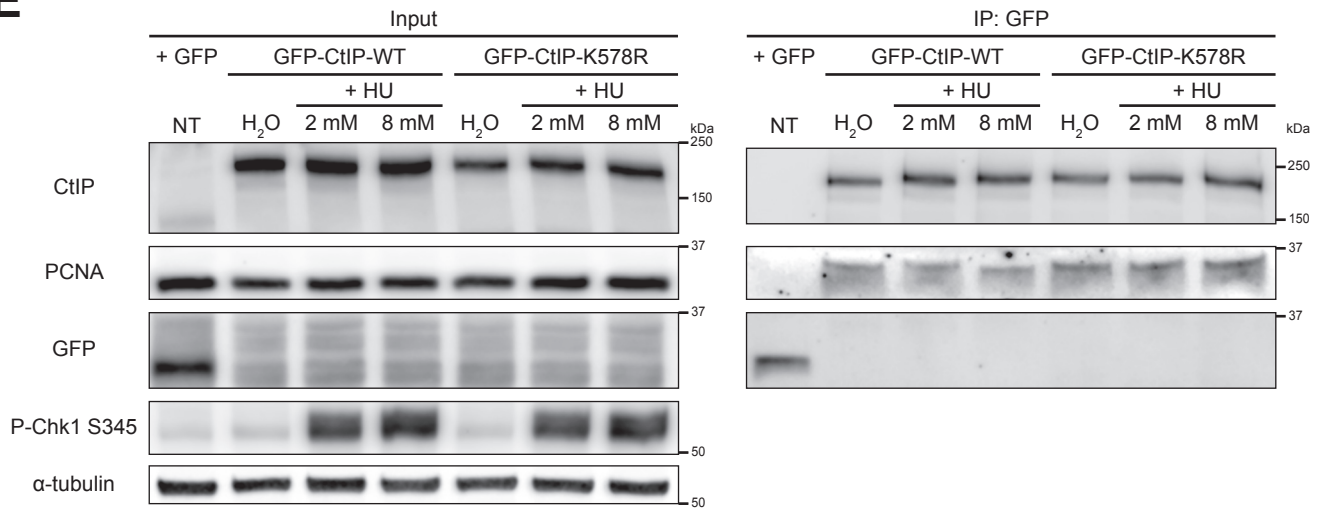

**A**

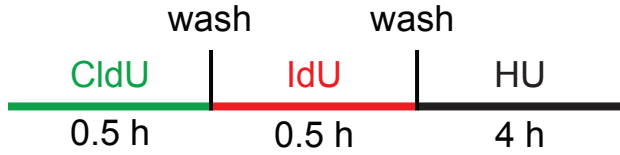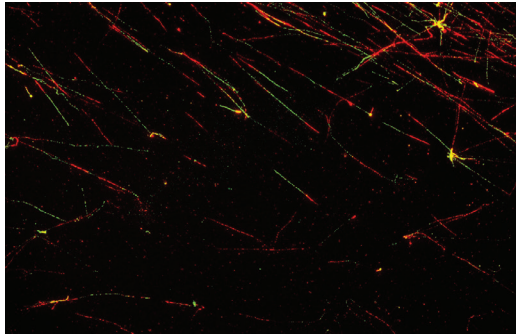

**B**

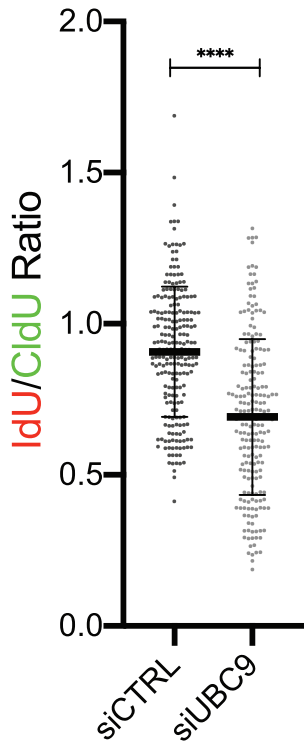

**C**

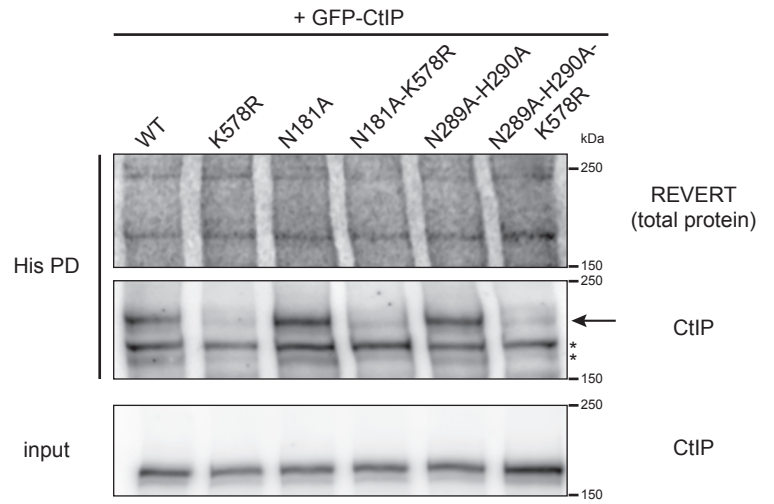

**D**

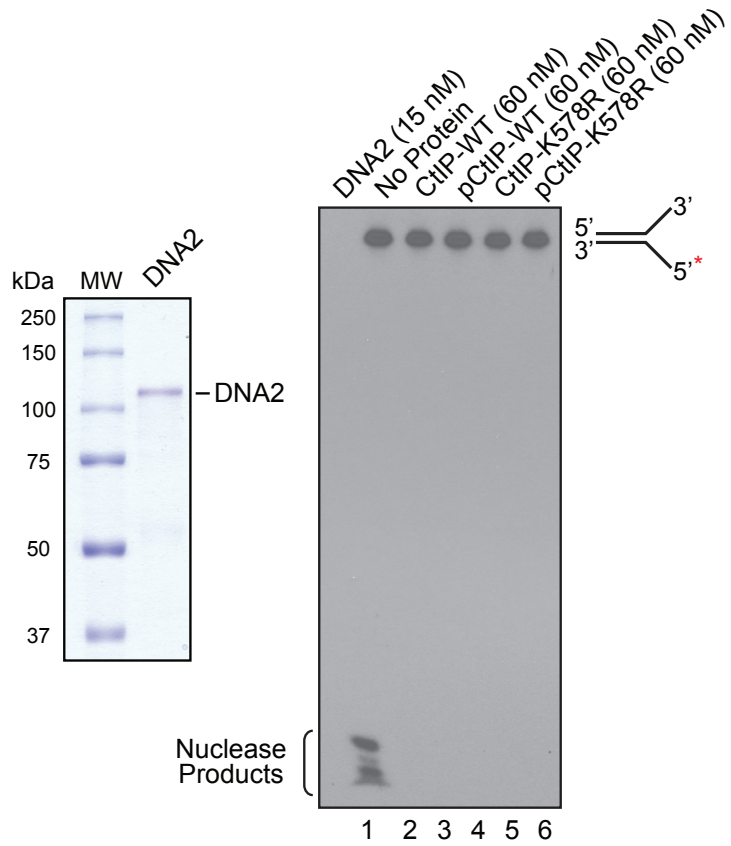

Supplement: gkaa1232_supplemental_file.pdf [file gkaa1232_supplemental_file.pdf]
